# Supplementary material for: Flavored E-Cigarette Sales Restrictions and Young Adult Tobacco Use
Source: PubMed Central journal article supplement (PMC11681375; doi:10.1001/jamahealthforum.2024.4594), 2024-12-27
Supplement: jamahealthforum-e244594-s002.pdf [file jamahealthforum-e244594-s002.pdf]

## Data Sharing Statement

Friedman. Flavored E-Cigarette Sales Restrictions and Young Adult Tobacco Use. *JAMA Health Forum*. Published December 27, 2024. doi:10.1001/jamahealthforum.2024.4594

### Data

**Data available:** No

### Additional Information

**Explanation for why data not available:** Behavioral Risk Factor Surveillance System survey data are publicly available for download ([https://www.cdc.gov/brfss/data\\_documentation/index.htm](https://www.cdc.gov/brfss/data_documentation/index.htm)). We do not have approval to disseminate those data separately from CDC. Our state-by-quarter flavor policy data will be made available as part of a separate manuscript currently under peer review, once that article is published.
